# Supplementary material for: DFT Analysis of NO Adsorption on the Undoped and Ce-Doped LaCoO3 (011) Surface
Source: MDPI journal article supplement (doi:10.3390/ma12091379), 2019-04-28
Supplement: s1 [file s1]

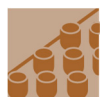

# DFT Analysis of NO Adsorption on the Undoped and Ce-Doped $\text{LaCoO}_3$ (011) Surface

Xiaochen Li <sup>1,2</sup> and Hongwei Gao <sup>3,\*</sup>

Supplementary materials:

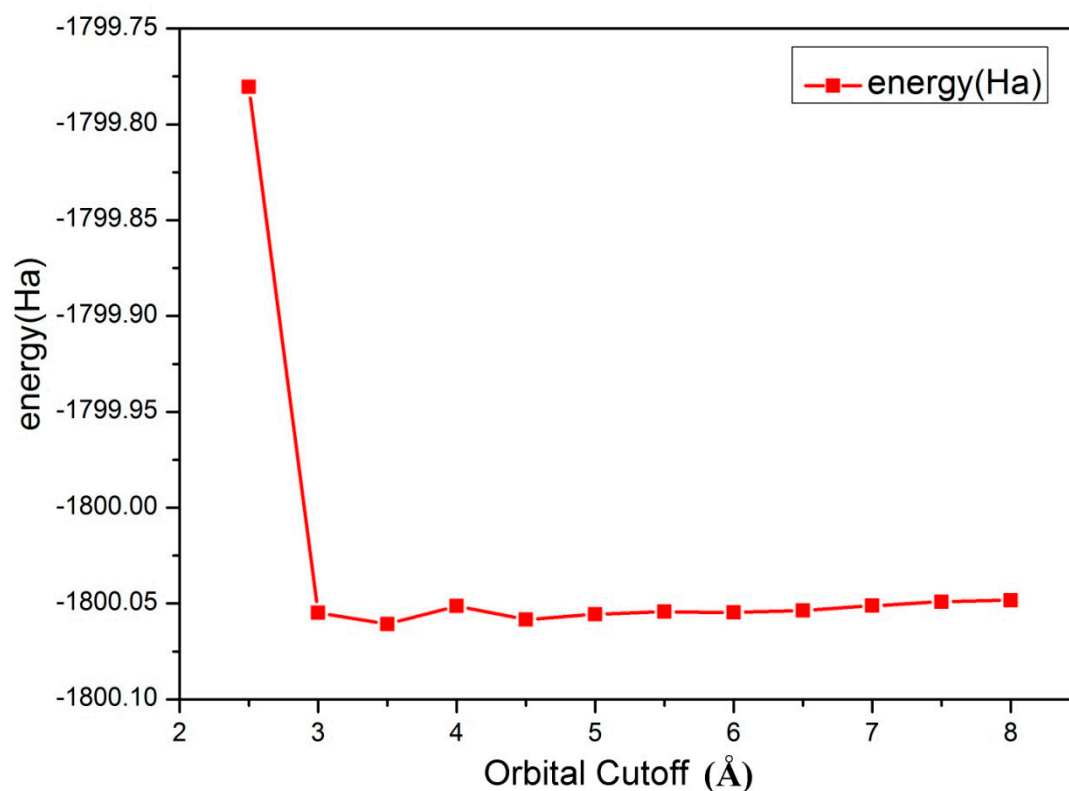

Figure S1. Convergence test image of global orbital cutoff.

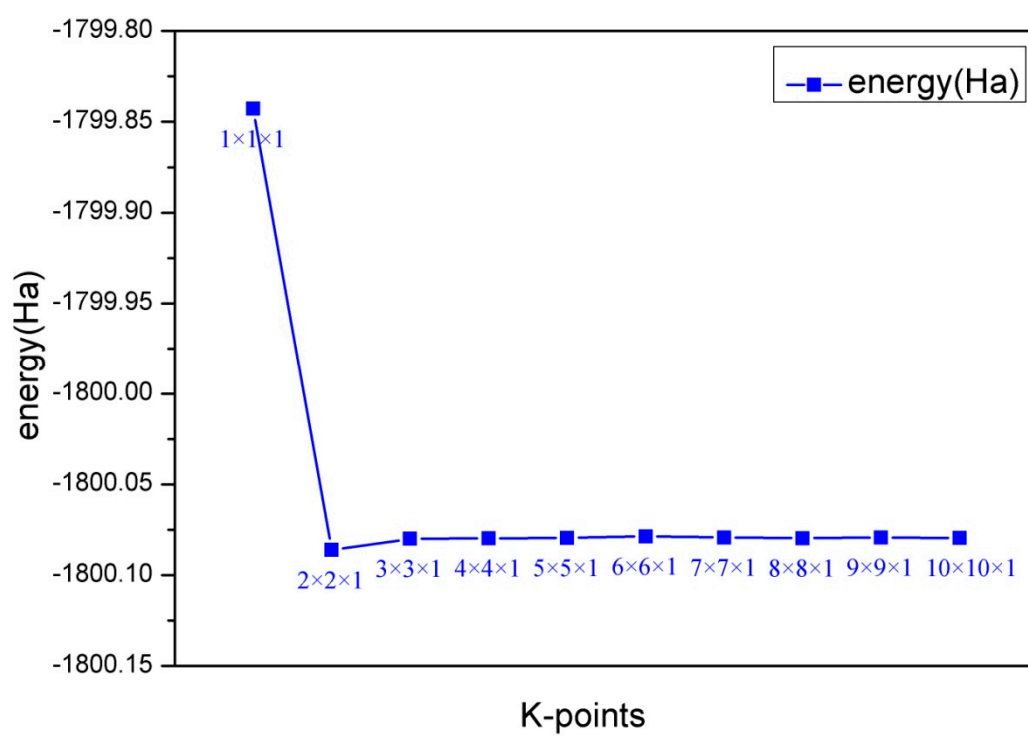

**Figure S2.** Convergence test image of K-points.
